# Supplementary material
Source: HighWire-hosted journal article supplement (https://injuryprevention.bmj.com/content/24/2/161)
Supplement: inline-supplementary-material-1 [file inline-supplementary-material-1.pdf]

## **Supplementary Appendix**

### **Formal Firearm Training Among Adults in the United States: Results of a National Survey**

Ali Rowhani-Rahbar, MD, MPH, PhD; Vivian H Lyons, MPH; Joseph A Simonetti, MD, MPH; Deborah Azrael, PhD; Matthew Miller, MD, ScD

## Selected Survey Questions

*Throughout this survey we use the word gun to refer to any firearm, including pistols, revolvers, shotguns and rifles, but not including air guns, bb guns, starter pistols or paintball guns. By "working guns," we mean guns that are in working order - that is capable of being fired.*

- Q. Do you or does anyone else you live with currently own any type of gun?
- Yes
  - No
- Q. [If Yes] Do you personally own a gun?
- Yes
  - No
- Q. In political matters, would you say you are...?
- Liberal
  - Moderate
  - Conservative
- Q. Which best describes the community that you currently live in?
- Urban
  - Suburban
  - Rural
- Q. At any time when you were growing up were there ever any guns in your home?
- Yes
  - No
  - No Opinion/Don't Know
- Q. Have you ever had any formal firearms training?
- Yes
  - No
- Q. [If Yes] Did the training include information on:
- Safe handling of firearms
  - Safe storage of firearms
  - Preventing firearm accidents
  - Preventing firearm theft
  - Suicide prevention

*We'd like to ask you about the types of guns you own. The types of guns we will be asking about are: handguns, long guns, modern sporting rifles, as well as any other types of guns you might own. Please do not include any air guns, bb guns or starter pistols. For each type of gun, please count only those guns that are in working order (can be fired) and count each gun only once.*

- Q. Do you personally own any of the following types of guns?
- Handguns
  - Long guns
  - Other
- Q. How many handguns do you own?

[Number Box, Range 0 – 100] Handguns

Q. What are the main reasons you own a handgun/handguns?

- For protection against strangers
- For protection against people I know
- For protection against animals
- For hunting
- For other sporting use
- For a collection
- For some other reason

Q. How many long guns do you own?  
[Number Box, Range 0 – 100] Long guns

Q. What are the main reasons you own a long gun/long guns?

- For protection against strangers
- For protection against people I know
- For protection against animals
- For hunting
- For other sporting use
- For a collection
- For some other reason

Q. Do you have a permit to carry a concealed gun, sometimes known as a CCW permit?

- Yes
- No

Q. In the past 30 days, have you carried a loaded handgun on your person?

- Yes
- No

Q. In the past 30 days, when you carried a loaded handgun on your person, what was the primary reason you carried the gun?

- For protection against strangers
- For protection against people I know
- For protection against animals
- For transporting the gun to or from work
- For use at work
- For transporting the gun to or from a shooting range
- For some other reason*

*We would like to ask for your opinion about a variety of firearm-related issues....*

Q. Everyone should have firearms safety training before buying their first gun.

- Strongly disagree
- Disagree
- Neither agree nor disagree
- Agree
- Strongly agree
